# Supplementary material for: Scratch-AID, a deep learning-based system for automatic detection of mouse scratching behavior with high accuracy
Source: eLife. 2022 Dec 8;11:e84042. doi: 10.7554/eLife.84042 (PMC9762698; doi:10.7554/eLife.84042)
Supplement: Supplementary file 1. [file elife-84042-supp1.docx]

**Supplementary file 1. Mouse information used in the recording of the training and test videos**

| **Video No.** | **Mouse No.** | **Injection site (nape)** | **Sex** | **Weight** | **Age** |
| --- | --- | --- | --- | --- | --- |
| V1 | M1 | Left 1 | F | 20.6g | 8-12 week |
| V2 | Left 2 |
| V3 | Right 1 |
| V4 | Right 2 |
| V5 | M2 | Left 1 | F | 21.1g |
| V6 | Left 2 |
| V7 | Right 1 |
| V8 | Right 2 |
| V9 | M3 | Left 1 | F | 23.3g |
| V10 | Left 2 |
| V11 | Right 1 |
| V12 | Right 2 |
| V13 | M4 | Left 1 | F | 21.2g |
| V14 | Left 2 |
| V15 | Right 1 |
| V16 | Right 2 |
| V17 | M5 | Left 1 | F | 21.4g |
| V18 | Left 2 |
| V19 | Right 1 |
| V20 | Right 2 |
| V21 | M6 | Left 1 | M | 25.2g |
| V22 | Left 2 |
| V23 | Right 1 |
| V24 | Right 2 |
| V25 | M7 | Left 1 | M | 25.5g |
| V26 | Left 2 |
| V27 | Right 1 |
| V28 | Right 2 |
| V29 | M8 | Left 1 | M | 21.5g |
| V30 | Left 2 |
| V31 | Right 1 |
| V32 | Right 2 |
| V33 | M9 | Left 1 | M | 27.8g |
| V34 | Left 2 |
| V35 | Right 1 |
| V36 | Right 2 |
| V37 | M10 | Left 1 | M | 25.9g |
| V38 | Left 2 |
| V39 | Right 1 |
| V40 | Right 2 |
